# Supplementary material
Source: PubMed Central journal article supplement (PMC7926258)
Supplement: EMBR-22-e50292-s001.pdf [file EMBR-22-e50292-s001.pdf]

## **Table of contents:**

|                          |   |
|--------------------------|---|
| Appendix Figure S1 ..... | 2 |
| Appendix Figure S2 ..... | 3 |
| Appendix Figure S3 ..... | 4 |
| Appendix Figure S4 ..... | 5 |
| Appendix Figure S5 ..... | 6 |
| Appendix Table S1 .....  | 7 |

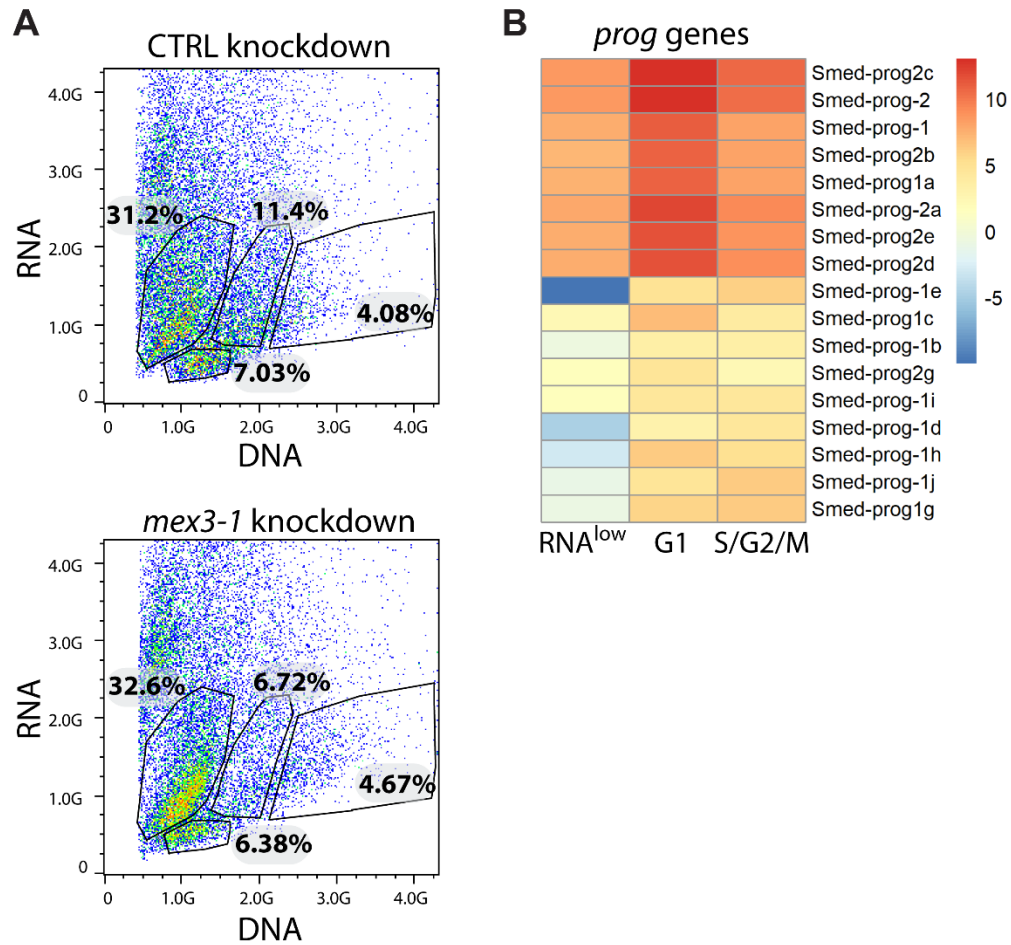

**Appendix Figure S1: The RNA<sup>low</sup> gate is unlikely to include early progeny cells.**

A FACS plots of dissociated cells from control or *mex3-1* KD animals. Percentages indicate the proportion of events within each gate. Plots are representative of n = 2 independent experiments.

B Expression of *prog*-family genes in bulk RNA-seq data of RNA<sup>low</sup>, G1 and S/G2/M cells.

Heatmap scale, log<sub>2</sub> normalized expression.

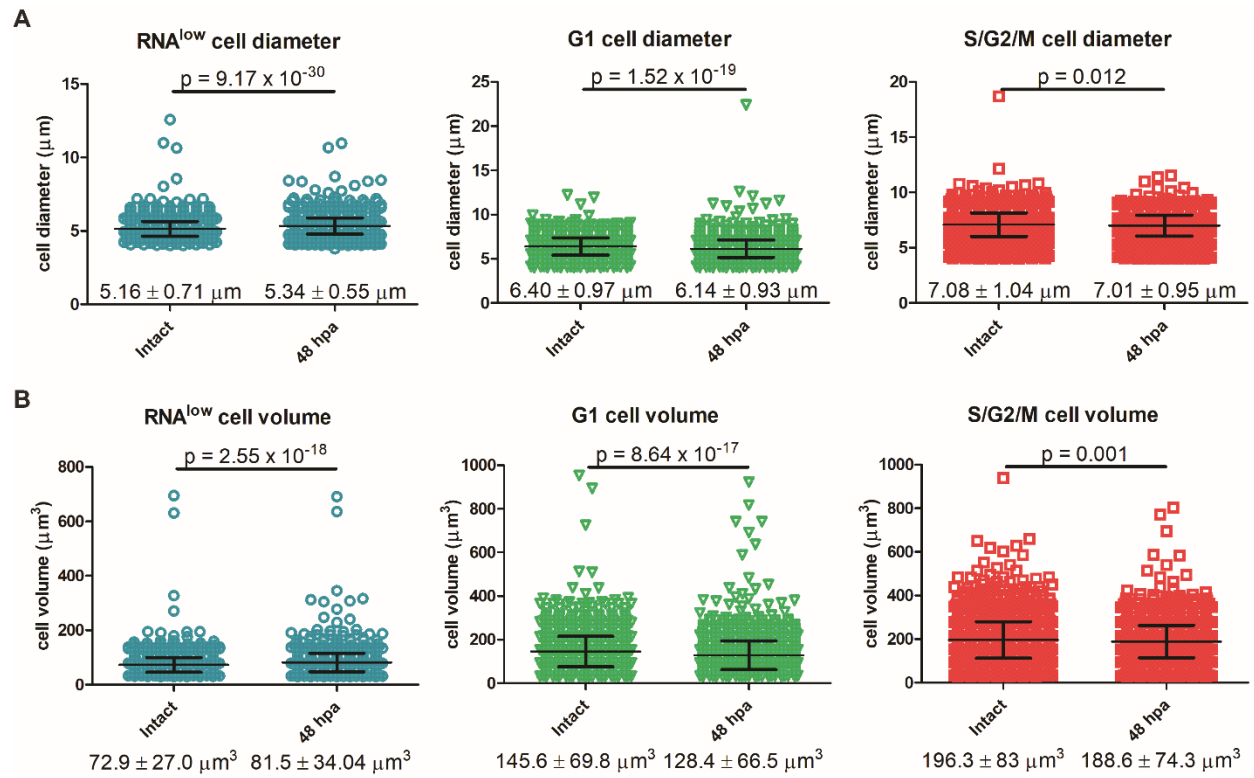

**Appendix Figure S2: Automated cell size measurements during regeneration.**

A-B Automated measurements of cell diameter (A) and volume (B) in RNA<sup>low</sup>, G1 and S/G2/M cells from intact and 48 hpa regenerating animals ( $n \geq 1700$ ). Data presented as mean  $\pm$  s.d. (indicated below data points). Statistical significance was assessed using Welch's t-tests (p values are indicated above data points).

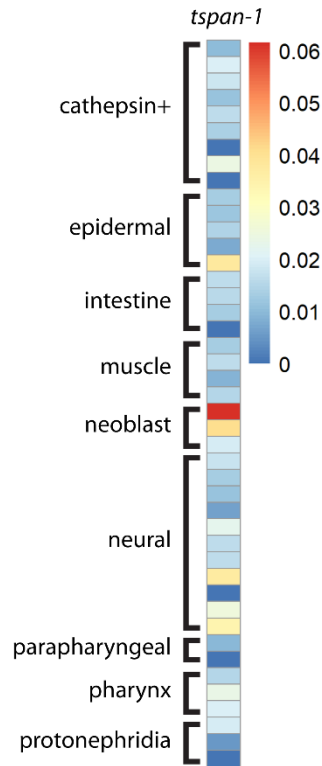

**Appendix Figure S3: *tspan-1* is broadly expressed by scRNAseq.**

Expression levels of *tspan-1* in major cell clusters from a published scRNAseq atlas of planarian tissues (Data ref: Fincher et al., 2018, downloaded from <https://compgen.bio.ub.edu/PlanNET/planexp>).

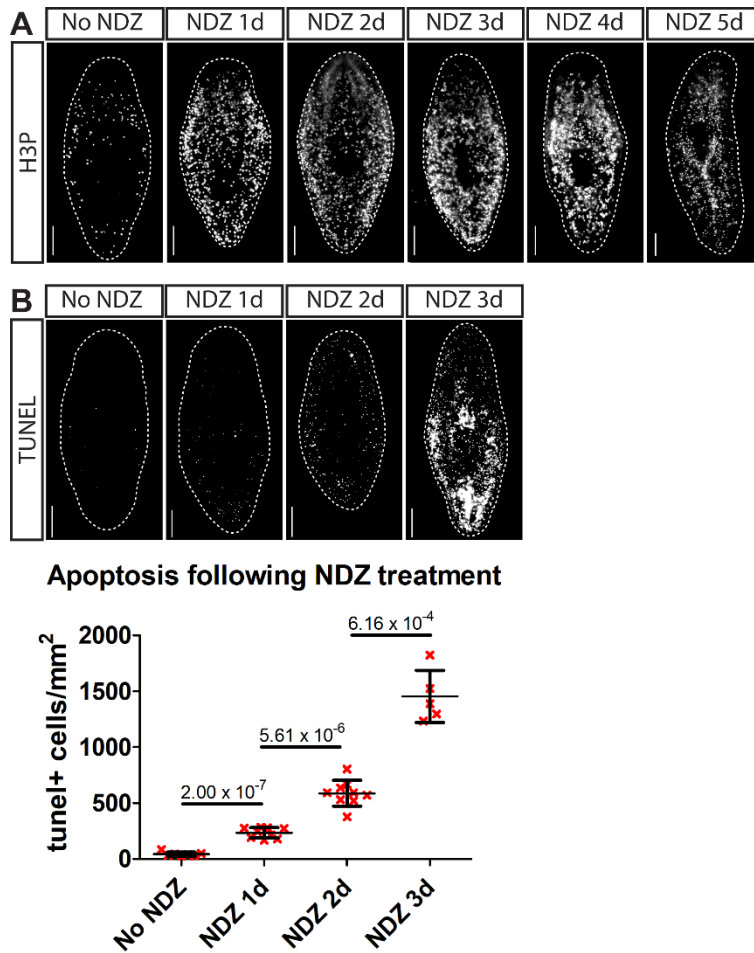

**Appendix Figure S4: Effect of NDZ treatment on mitosis and cell death.**

A H3P immunostaining in untreated animals and after 1-5 days of continuous NDZ treatment.

Scale bars = 250  $\mu$ m.

B TUNEL staining and quantification in untreated animals and after 1-3 days of continuous NDZ

treatment. Data presented as mean  $\pm$  s.d. Statistical significance was assessed using Welch's t-

tests (p values are indicated). Scale bars = 250  $\mu$ m. n = 5-10 animals per timepoint.

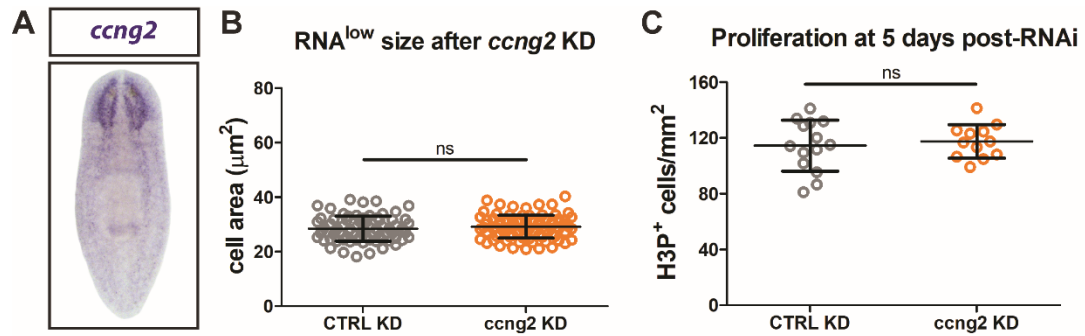

**Appendix Figure S5: *ccng2* knockdown does not affect RNA<sup>low</sup> neoblast size or homeostatic proliferation.**

A Representative WISH images for *ccng2*.

B RNA<sup>low</sup> neoblast size in intact animals following control or *ccng2* knockdown (n ≥ 75).

C Quantification of H3P immunostaining in intact animals following control or *ccng2* knockdown (n = 12-14).

Data information: Data in B and C are presented as mean ± s.d. Statistical significance was assessed using Welch's t-tests (ns, not significant (p > 0.05)).

## Appendix Table S1: Transcript IDs

This table contains a list of all genes referenced in this manuscript and their transcript IDs corresponding to the transcriptome under NCBI BioProject PRJNA215411.

| GENE                 | TRANSCRIPT ID   |
|----------------------|-----------------|
| atg7                 | SmedASXL_014971 |
| aurkb                | SmedASXL_013325 |
| blm                  | SmedASXL_017447 |
| cdc45                | SmedASXL_011414 |
| chaf1b               | SmedASXL_013663 |
| ctdsp1               | SmedASXL_018115 |
| cyclin B2            | SmedASXL_013627 |
| cyclin C             | SmedASXL_011068 |
| cyclin D2            | SmedASXL_010420 |
| cyclin G2<br>(ccng2) | SmedASXL_007037 |
| dicer                | SmedASXL_006374 |
| egfr-3               | SmedASXL_000685 |
| egr-1                | SmedASXL_008042 |
| elav-2               | SmedASXL_013243 |
| exo1                 | SmedASXL_015035 |
| ezh1                 | SmedASXL_013155 |
| fen1                 | SmedASXL_006671 |
| foxo3                | SmedASXL_012875 |
| fst                  | SmedASXL_012581 |
| gata123              | SmedASXL_006281 |
| gata456              | SmedASXL_011703 |
| gins2                | SmedASXL_010901 |
| hnf4                 | SmedASXL_002078 |
| kif20b               | SmedASXL_016228 |
| kif23                | SmedASXL_017628 |
| lbr                  | SmedASXL_019163 |
| lkb1                 | SmedASXL_005843 |
| Lrig-1               | SmedASXL_013974 |
| mcm2                 | SmedASXL_014198 |
| mcm4                 | SmedASXL_012910 |
| mcm5                 | SmedASXL_012139 |
| mcm7                 | SmedASXL_007040 |
| mki67                | SmedASXL_018866 |
| msh2                 | SmedASXL_013478 |

|              |                 |
|--------------|-----------------|
| msi-1        | SmedASXL_011563 |
| nasp         | SmedASXL_000706 |
| p53          | SmedASXL_008454 |
| pcna         | SmedASXL_002240 |
| piwi-1       | SmedASXL_008653 |
| piwi-2       | SmedASXL_018810 |
| piwi-3       | SmedASXL_002725 |
| pola1        | SmedASXL_018375 |
| prim1        | SmedASXL_000760 |
| rad51        | SmedASXL_006619 |
| randap1      | SmedASXL_010114 |
| rb           | SmedASXL_016270 |
| rpa2         | SmedASXL_019468 |
| rrm1         | SmedASXL_012448 |
| ski-1        | SmedASXL_002407 |
| slbp         | SmedASXL_008863 |
| smarca2      | SmedASXL_017781 |
| smc4         | SmedASXL_016045 |
| Smed-prog-1  | SmedASXL_011484 |
| Smed-prog1a  | SmedASXL_013664 |
| Smed-prog-1b | SmedASXL_008207 |
| Smed-prog1c  | SmedASXL_003799 |
| Smed-prog-1d | SmedASXL_005723 |
| Smed-prog-1e | SmedASXL_004473 |
| Smed-prog1g  | SmedASXL_003595 |
| Smed-prog-1h | SmedASXL_009962 |
| Smed-prog-1i | SmedASXL_013905 |
| Smed-prog-1j | SmedASXL_002658 |
| Smed-prog-2  | SmedASXL_073532 |
| Smed-prog-2a | SmedASXL_014068 |
| Smed-prog2b  | SmedASXL_008106 |
| Smed-prog2c  | SmedASXL_010535 |
| Smed-prog2d  | SmedASXL_010536 |
| Smed-prog2e  | SmedASXL_012073 |
| Smed-prog2g  | SmedASXL_004274 |
| soxP-1       | SmedASXL_013552 |
| soxP-2       | SmedASXL_013986 |
| soxP-3       | SmedASXL_004704 |
| tef          | SmedASXL_011746 |
| thra         | SmedASXL_017328 |
| ttk          | SmedASXL_015562 |



|        |                 |
|--------|-----------------|
| tym5   | SmedASXL_004854 |
| ubr7   | SmedASXL_019427 |
| ung    | SmedASXL_005855 |
| zfp-1  | SmedASXL_001731 |
| znf-91 | SmedASXL_011708 |
